# Supplementary material for: Transcutaneous electrical acupoint stimulation for the prevention of perioperative neurocognitive disorders in geriatric patients: A systematic review and meta-analysis of randomized controlled trials
Source: PubMed Central journal article supplement — Medicine (Baltimore). 2022 Dec 16;101(50):e32329. doi: 10.1097/MD.0000000000032329 (PMC9771360; doi:10.1097/md.0000000000032329), 2022-12-16
Supplement: medi-101-e32329-s001.pdf [file medi-101-e32329-s001.pdf]

## *Supplementary Material*

### **1 Supplementary Data**

#### **The search strategy used for PubMed**

#1 (((((((((((((((((((Neurocognitive Disorders[MeSH Terms] ) OR (Disorder, Neurocognitive[Title/Abstract])) OR (Disorders, Neurocognitive[Title/Abstract])) OR (Neurocognitive Disorder[Title/Abstract])) OR (Organic Brain Syndrome, Nonpsychotic[Title/Abstract])) OR (Nonpsychotic Organic Brain Syndrome[Title/Abstract])) OR (Organic Mental Disorders, Psychotic[Title/Abstract])) OR (Psychoses, Traumatic[Title/Abstract])) OR (Traumatic Psychoses[Title/Abstract])) OR (Delirium, Dementia, Amnesic, Cognitive Disorders[Title/Abstract])) OR (Mental Disorders, Organic[Title/Abstract])) OR (Disorders, Organic Mental[Title/Abstract])) OR (Mental Disorder, Organic[Title/Abstract])) OR (Organic Mental Disorder[Title/Abstract])) OR (Organic Mental Disorders[Title/Abstract])) OR (Kandinsky Syndrome[Title/Abstract])) OR (Clerambault Syndrome[Title/Abstract])) OR (perioperative neurocognitive disorders[Title/Abstract]))) OR (PND[Title/Abstract]) **8026**

#2 (((((((((((((((((((Postoperative Cognitive Complications[MeSH Terms]) OR (Cognitive Complication, Postoperative[Title/Abstract])) OR (Cognitive Complications, Postoperative[Title/Abstract])) OR (Complication, Postoperative Cognitive[Title/Abstract])) OR (Complications, Postoperative Cognitive[Title/Abstract])) OR (Postoperative Cognitive Complication[Title/Abstract])) OR (Postoperative Cognitive Dysfunction[Title/Abstract])) OR (Cognitive Dysfunction, Postoperative[Title/Abstract])) OR (Cognitive Dysfunctions, Postoperative[Title/Abstract])) OR (Dysfunction, Postoperative Cognitive[Title/Abstract])) OR (Dysfunctions, Postoperative Cognitive[Title/Abstract])) OR (Postoperative Cognitive Dysfunctions[Title/Abstract])) OR (Postoperative Decline[Title/Abstract])) OR (Decline, Postoperative[Title/Abstract])) OR (Declines, Postoperative[Title/Abstract])) OR (Postoperative Declines[Title/Abstract])) OR (postoperative cognitive dysfunction[Title/Abstract]) AND (randomizedcontrolledtrial[Filter])) OR (POCD[Title/Abstract]) **656**

#3 (((((((((((delirium[MeSH Terms]) OR (Subacute Delirium[Title/Abstract])) OR (Delirium, Subacute[Title/Abstract])) OR (Deliriums, Subacute[Title/Abstract])) OR (Subacute Deliriums[Title/Abstract])) OR (Delirium of Mixed Origin[Title/Abstract])) OR (Mixed Origin Delirium[Title/Abstract])) OR (Mixed Origin Deliriums[Title/Abstract])) OR (postoperative delirium[Title/Abstract])) OR (POD[Title/Abstract]) **1052**

#4 #1 OR #2 OR #3 **8960**

#5 ((((((transcutaneous electrical acupoint stimulation[Title/Abstract]) OR (TEAS[Title/Abstract])) OR (transcutaneous acupoint electrical stimulation[Title/Abstract])) OR (TAES[Title/Abstract])) OR (acustimulation[Title/Abstract])) OR (electrical[Title/Abstract])) OR (acupoint[Title/Abstract]) **4689**

#6 #4 AND #5

**64****The search strategy used for EMBASE**

#1 'perioperative neurocognitive disorders'/exp

**11**

#2 'neurocognitive disorders':ti,ab,kw OR 'disorder\*', neurocognitive':ti,ab,kw OR 'organic brain syndrome, nonpsycho\*':ti,ab,kw OR 'psycho\*', traumatic':ti,ab,kw OR 'delirium, dementia, amnestic, cognitive disorder\*':ti,ab,kw OR 'mental disorder\*', organic':ti,ab,kw OR 'disorder\*', organic mental':ti,ab,kw OR 'mental disorder\*', organic':ti,ab,kw OR 'kandinsky syndrome':ti,ab,kw OR 'clerambault syndrome':ti,ab,kw OR pnd:ti,ab,kw

**11,637**

#3 'postoperative cognitive dysfunction'/exp

**1,544**

#4 'postoperative cognitive complications':ti,ab,kw OR 'cognitive, complication\*', postoperative':ti,ab,kw OR 'postoperative, cognitive, dysfunction\*':ti,ab,kw OR 'postoperative, decline\*':ti,ab,kw OR pocd:ti,ab,kw

**2,475**

#5 'postoperative delirium'/exp

**3,106**

#6 'delirium':ti,ab,kw OR 'delirium\*', subacute':ti,ab,kw OR 'delirium\* of mixed origin':ti,ab,kw OR 'mixed origin delirium\*':ti,ab,kw OR pod:ti,ab,kw

**45,457**

#7 #1 OR #2 OR #3 OR #4 OR #5 OR #6

**59,979**

#8 'transcutaneous electrical acupoints stimulation'/exp

**55**

#9 teas:ti,ab,kw OR 'transcutaneous acupoint electrical stimulation':ti,ab,kw OR taes:ti,ab,kw OR acustimulation:ti,ab,kw OR electrical:ti,ab,kw OR acupoint:ti,ab,kw

**2**

#10 #8 OR #9

**245,787**

#11 #7 AND #10

**271**

## **The search strategy used for CENTRAL**

|                                                                                                                                                                                                                                                                                     |              |
|-------------------------------------------------------------------------------------------------------------------------------------------------------------------------------------------------------------------------------------------------------------------------------------|--------------|
| #1 MeSH descriptor: [Neurocognitive Disorders] explode all trees                                                                                                                                                                                                                    | <b>12298</b> |
| #2 (perioperative neurocognitive disorders):ti,ab,kw OR (Disorder*, Neurocognitive):ti,ab,kw OR (Organic Brain Syndrome, Nonpsycho*):ti,ab,kw OR (Psycho*, Traumatic):ti,ab,kw OR (Delirium, Dementia, Amnestic, Cognitive Disorder*):ti,ab,kw (Word variations have been searched) | <b>52</b>    |
| #3 (PND):ti,ab,kw OR (Disorder*, Organic Mental):ti,ab,kw OR (Mental Disorder*, Organic):ti,ab,kw OR (Kandinsky Syndrome):ti,ab,kw OR (Clerambault Syndrome):ti,ab,kw (Word variations have been searched)                                                                          | <b>164</b>   |
| #4 MeSH descriptor: [Postoperative Cognitive Complications] explode all trees                                                                                                                                                                                                       | <b>29</b>    |
| #5 (postoperative cognitive dysfunction):ti,ab,kw OR (Cognitive, Complication*, Postoperative):ti,ab,kw OR (Postoperative, Cognitive, Dysfunction*):ti,ab,kw OR (Postoperative, Decline*):ti,ab,kw OR (POCD):ti,ab,kw (Word variations have been searched)                          | <b>2302</b>  |
| #6 MeSH descriptor: [Delirium] explode all trees                                                                                                                                                                                                                                    | <b>909</b>   |
| #7 (postoperative delirium):ti,ab,kw OR (Delirium*, Subacute):ti,ab,kw OR (Delirium* of Mixed Origin):ti,ab,kw OR (Mixed Origin Delirium*):ti,ab,kw OR (POD):ti,ab,kw (Word variations have been searched)                                                                          | <b>4093</b>  |
| #8 (transcutaneous electrical acupoint stimulation):ti,ab,kw OR (TEAS):ti,ab,kw OR (TAES):ti,ab,kw OR (transcutaneous acupoint electrical stimulation):ti,ab,kw OR (acustimulation):ti,ab,kw (Word variations have been searched)                                                   | <b>4825</b>  |
| #9 (electrical):ti,ab,kw OR (acupoint):ti,ab,kw (Word variations have been searched)                                                                                                                                                                                                | <b>25280</b> |
| #10 #1 OR #2 OR #3 OR #4 OR #5 OR #6 OR #7                                                                                                                                                                                                                                          | <b>17757</b> |
| #11 #8 OR #9                                                                                                                                                                                                                                                                        | <b>29389</b> |
| #12 #10 AND #11                                                                                                                                                                                                                                                                     | <b>337</b>   |

**The search strategy used for CNKI (n = 518)**

采用高级检索，在主题词框内输入检索式，在文献分类中选择“医药卫生科技”。

主题: (术后认知障碍 + 术后谵妄 + 术后认知功能下降 + 认知功能 + 认知 + 术 + PND + POCD + POD) \* (经皮穴位电刺激 + 经皮电刺激 + 穴位电刺激 + TEAS + TAES)

**The search strategy used for Wan Fang Database (n = 1135)**

采用高级检索，文献类型选择“期刊论文”、“学位论文”、“会议论文”

#1 题名或关键词: 术后认知障碍 OR 术后谵妄 OR 术后认知功能下降 OR 认知功能 OR 认知 OR PND OR POCD OR POD

#2 题名或关键词: 经皮穴位电刺激 OR 经皮电刺激 OR 穴位电刺激 OR TEAS OR TAES

#3 #1 AND #2

**The search strategy used for VIP (n = 531)**

(M = (术后认知障碍 OR 术后谵妄 OR 术后认知功能下降 OR 认知功能 OR 认知 OR 术 OR PND OR POCD OR POD) AND (经皮穴位电刺激 OR 经皮电刺激 OR 穴位电刺激 OR TEAS OR TAES))
