# Supplementary material for: Transcutaneous electrical acupoint stimulation for the prevention of perioperative neurocognitive disorders in geriatric patients: A systematic review and meta-analysis of randomized controlled trials
Source: PubMed Central journal article supplement — Medicine (Baltimore). 2022 Dec 16;101(50):e32329. doi: 10.1097/MD.0000000000032329 (PMC9771360; doi:10.1097/md.0000000000032329), 2022-12-16

**FIGURE 1** | Meta-analysis and forest plot for (A) biochemical indicator (S100 $\beta$ ) and (B) dosage of anesthetics. S100 $\beta$ : pg/mL.

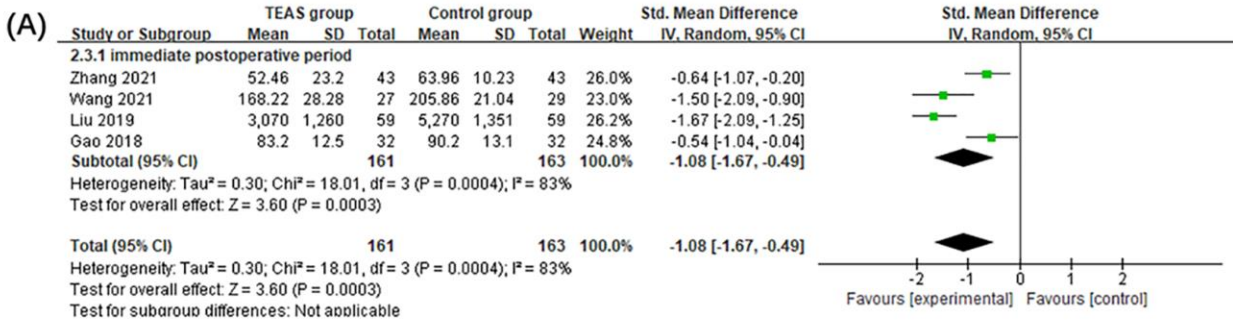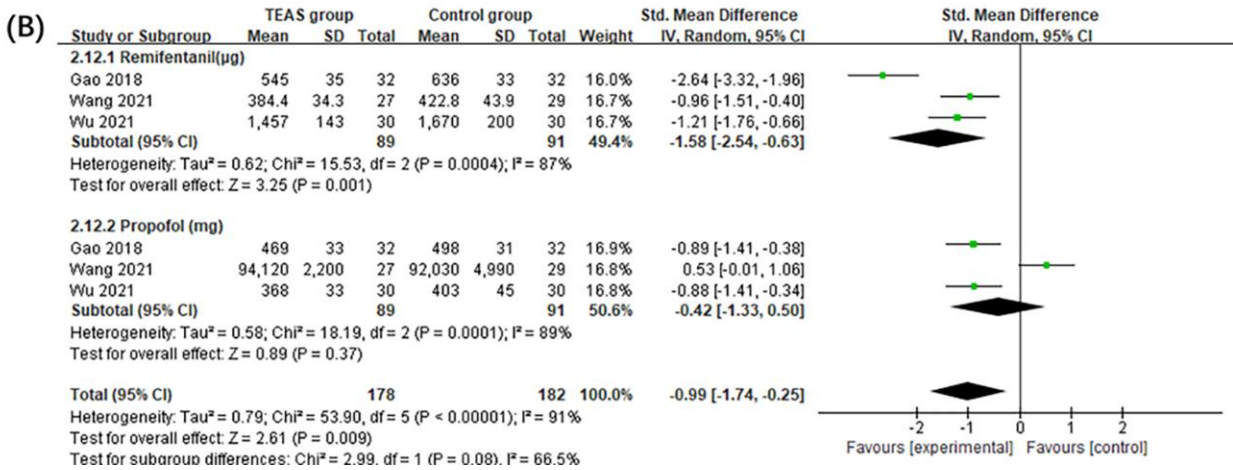

Supplement: medi-101-e32329-s002.pdf [file medi-101-e32329-s002.pdf]
