# Supplementary material for: Transcutaneous electrical acupoint stimulation for the prevention of perioperative neurocognitive disorders in geriatric patients: A systematic review and meta-analysis of randomized controlled trials
Source: PubMed Central journal article supplement — Medicine (Baltimore). 2022 Dec 16;101(50):e32329. doi: 10.1097/MD.0000000000032329 (PMC9771360; doi:10.1097/md.0000000000032329), 2022-12-16
Supplement: medi-101-e32329-s006.pdf [file medi-101-e32329-s006.pdf]

**TABLE 1 | GRADE summary of findings.**

**TEAS group compared to Control group for the prevention of the incidence of perioperative neurocognitive disorders (PND).**

**Patient or population:** patients undergoing surgical procedures

**Settings:** Inpatients

**Intervention:** TEAS

**Comparison:** Sham intervention

| Outcomes                                             | Illustrative comparative risks* (95% CI) |                                                                                                                         | Relative effect (95% CI)         | No of Participants (studies) | Quality of the evidence (GRADE)          | Importance |
|------------------------------------------------------|------------------------------------------|-------------------------------------------------------------------------------------------------------------------------|----------------------------------|------------------------------|------------------------------------------|------------|
|                                                      | Assumed risk                             | Corresponding risk                                                                                                      |                                  |                              |                                          |            |
|                                                      | Control intervention                     | TEAS                                                                                                                    |                                  |                              |                                          |            |
| <b>PND response rate</b>                             | <b>198 per 1000</b>                      | <b>85 per 1000</b><br>(63 to 121)                                                                                       | <b>RR 0.43</b><br>(0.32 to 0.61) | 999<br>(13 studies)          | ⊕⊕⊖⊖<br><b>low</b> <sup>1,2</sup>        | CRITICAL   |
| <b>POD response rate</b><br>Follow-up: within 7 days | <b>242 per 1000</b>                      | <b>94 per 1000</b><br>(62 to 143)                                                                                       | <b>RR 0.39</b><br>(0.26 to 0.59) | 579<br>(7 studies)           | ⊕⊕⊖⊖<br><b>low</b> <sup>1,2</sup>        | CRITICAL   |
| <b>CAM scores</b><br>Follow-up: within 7 days        | -                                        | The mean CAM scores in the TEAS groups was <b>-1.30 lower</b><br>(-2.14 to -0.46 lower)                                 | Not applicable                   | 251<br>(3 studies)           | ⊕⊕⊖⊖<br><b>low</b> <sup>1,2</sup>        | IMPORTANT  |
| <b>Dosage of anesthetics--remifentanil</b>           | -                                        | The mean dosage of remifentanil in the TEAS groups was <b>-1.58 standard deviations lower</b><br>(-2.54 to -0.63 lower) | Not applicable                   | 180<br>(3 studies)           | ⊕⊖⊖⊖<br><b>very low</b> <sup>1,2,3</sup> | IMPORTANT  |

|                                        |   |                                                                                                                       |                |                    |                                   |           |
|----------------------------------------|---|-----------------------------------------------------------------------------------------------------------------------|----------------|--------------------|-----------------------------------|-----------|
| <b>Dosage of anesthetics--propofol</b> | - | The mean dosage of propofol in the TEAS groups was<br><b>-0.42 standard deviations lower</b><br>(-1.33 to 0.50 lower) | Not applicable | 180<br>(3 studies) | ⊕⊕⊖⊖<br><b>low</b> <sup>1,2</sup> | IMPORTANT |
|----------------------------------------|---|-----------------------------------------------------------------------------------------------------------------------|----------------|--------------------|-----------------------------------|-----------|

\*The basis for the **assumed risk** (e.g. the median control group risk across studies) is provided in footnotes. The **corresponding risk** (and its 95% confidence interval) is based on the assumed risk in the comparison group and the **relative effect** of the intervention (and its 95% CI).

**CI:** Confidence interval; **RR:** Risk ratio;

GRADE Working Group grades of evidence

**High quality:** Further research is very unlikely to change our confidence in the estimate of effect.

**Moderate quality:** Further research is likely to have an important impact on our confidence in the estimate of effect and may change the estimate.

**Low quality:** Further research is very likely to have an important impact on our confidence in the estimate of effect and is likely to change the estimate.

**Very low quality:** We are very uncertain about the estimate.

<sup>1</sup> Downgraded one level owing to high risk of performance bias across some included studies.

<sup>2</sup> Downgraded one level owing to small sample size for detecting publication bias.

<sup>3</sup> Downgraded one level owing to substantial heterogeneity ( $I^2 > 50\%$ ).

**TABLE 2 | GRADE summary of findings.**

**TEAS group compared to Control group for the prevention of the incidence of perioperative neurocognitive disorders (PND).**

**Patient or population:** patients undergoing surgical procedures

**Settings:** Inpatients

**Intervention:** TEAS

**Comparison:** Control intervention (no treatment/ sham intervention)

| Outcomes                                                                                              | Illustrative comparative risks* (95% CI) |                                                                                                                               | Relative effect (95% CI)         | No of Participants (studies) | Quality of the evidence (GRADE)          | Importance |
|-------------------------------------------------------------------------------------------------------|------------------------------------------|-------------------------------------------------------------------------------------------------------------------------------|----------------------------------|------------------------------|------------------------------------------|------------|
|                                                                                                       | Assumed risk<br>Control intervention     | Corresponding risk<br>TEAS                                                                                                    |                                  |                              |                                          |            |
| <b>DNR response rate</b><br><br>Follow-up: within 30 days (postoperative day 7; postoperative day 30) | <b>180 per 1000</b>                      | <b>92 per 1000</b><br>(59 to 140)                                                                                             | <b>RR 0.51</b><br>(0.33 to 0.78) | 569<br>(8 studies)           | ⊕⊕⊖⊖<br><b>low</b> <sup>1,2</sup>        | CRITICAL   |
| <b>MMSE scores</b><br><br>Follow-up: postoperative day 7                                              | -                                        | The mean MMSE scores in TEAS groups was <b>0 higher</b><br>(-0.46 to 0.46 higher)                                             | Not applicable                   | 350<br>(5 studies)           | ⊕⊖⊖⊖<br><b>very low</b> <sup>1,2,3</sup> | IMPORTANT  |
| <b>Biochemical indicator(S100β)</b><br><br>Follow-up: immediate postoperative period                  | -                                        | The mean biochemical indicator(s100β) in the TEAS groups was <b>-1.08 standard deviations lower</b><br>(-1.67 to -0.49 lower) | Not applicable                   | 324<br>(4 studies)           | ⊕⊖⊖⊖<br><b>very low</b> <sup>1,2,4</sup> | IMPORTANT  |

\*The basis for the **assumed risk** (e.g. the median control group risk across studies) is provided in footnotes. The **corresponding risk** (and its 95% confidence interval) is based on the assumed risk in the comparison group and the **relative effect** of the intervention (and its 95% CI).

---

**CI:** Confidence interval; **RR:** Risk ratio;

---

GRADE Working Group grades of evidence

**High quality:** Further research is very unlikely to change our confidence in the estimate of effect.

**Moderate quality:** Further research is likely to have an important impact on our confidence in the estimate of effect and may change the estimate.

**Low quality:** Further research is very likely to have an important impact on our confidence in the estimate of effect and is likely to change the estimate.

**Very low quality:** We are very uncertain about the estimate.

---

<sup>1</sup> Downgraded one level owing to high risk of performance bias across some included studies.

<sup>2</sup> Downgraded one level owing to small sample size for detecting publication bias.

<sup>3</sup> Downgraded one level for imprecision (CI included the null effect).

<sup>4</sup> Downgraded one level for inconsistency ( $I^2 > 50\%$ ).

---
