# Supplementary figures and images for: Transcutaneous electrical acupoint stimulation for the prevention of perioperative neurocognitive disorders in geriatric patients: A systematic review and meta-analysis of randomized controlled trials
Source: PubMed Central journal article supplement — Medicine (Baltimore). 2022 Dec 16;101(50):e32329. doi: 10.1097/MD.0000000000032329 (PMC9771360; doi:10.1097/md.0000000000032329), 2022-12-16

**FIGURE 2 |** Meta-analysis and forest plot for (A)the protocol of TEAS and (B)the choice of acupoints.

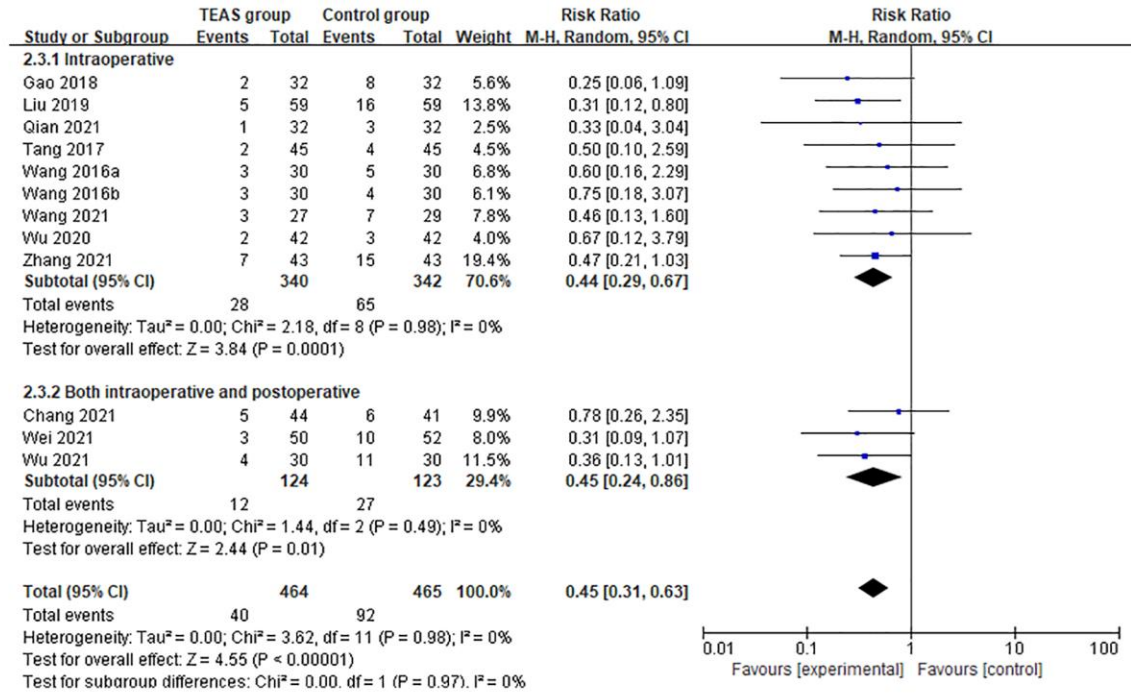

**(B)**

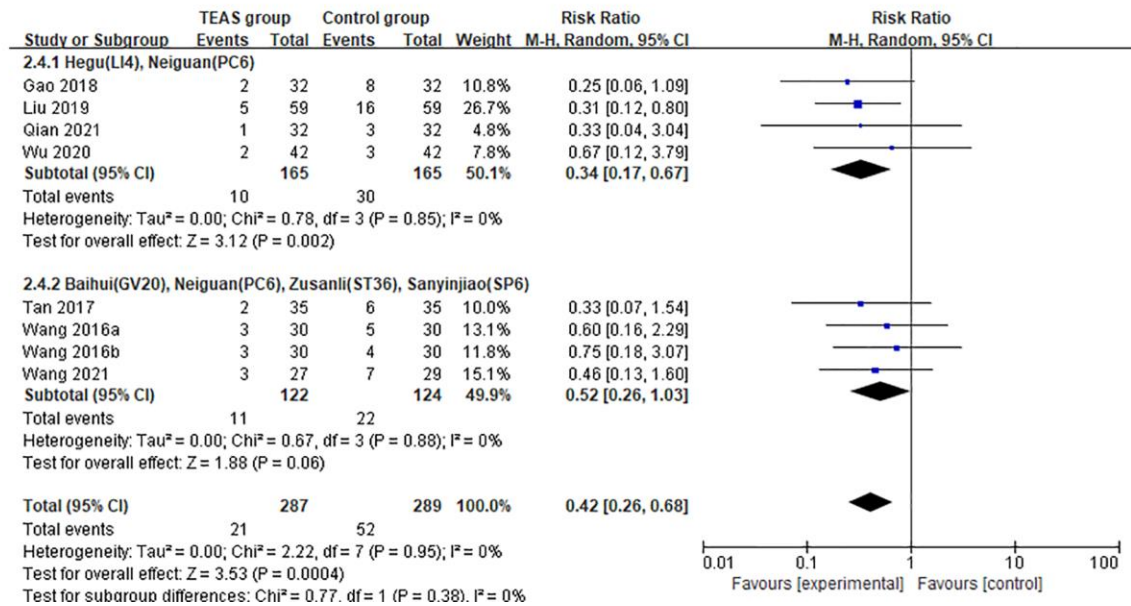

Supplement: medi-101-e32329-s003.pdf [file medi-101-e32329-s003.pdf]

**FIGURE 3 |** Meta-analysis and forest plot for (A)the surgery type and (B)the anesthetic modality.

**(A)**

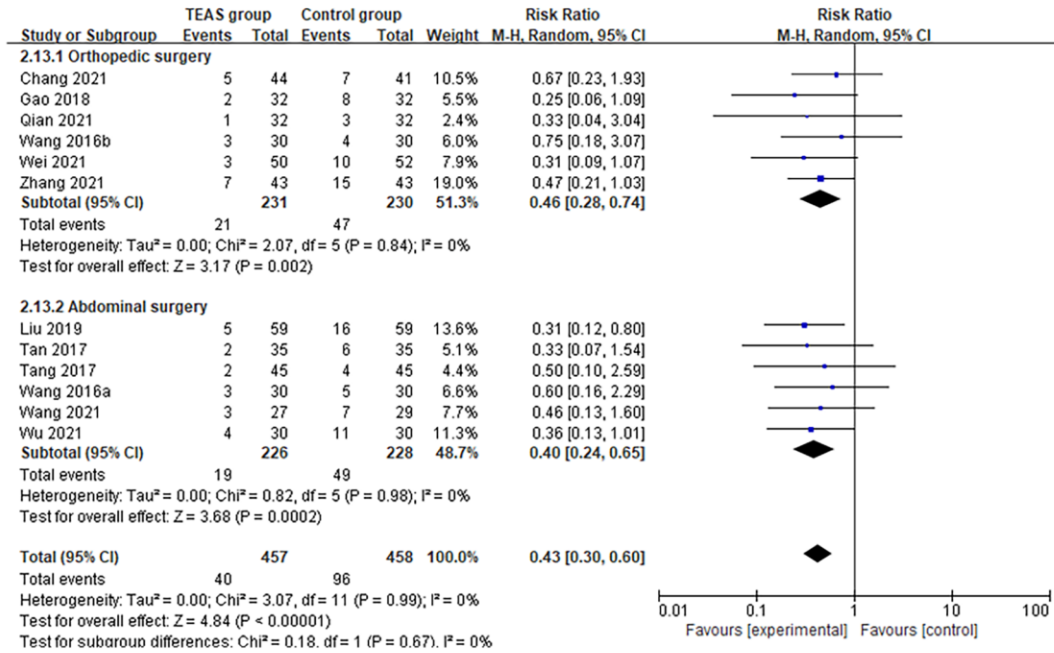

**(B)**

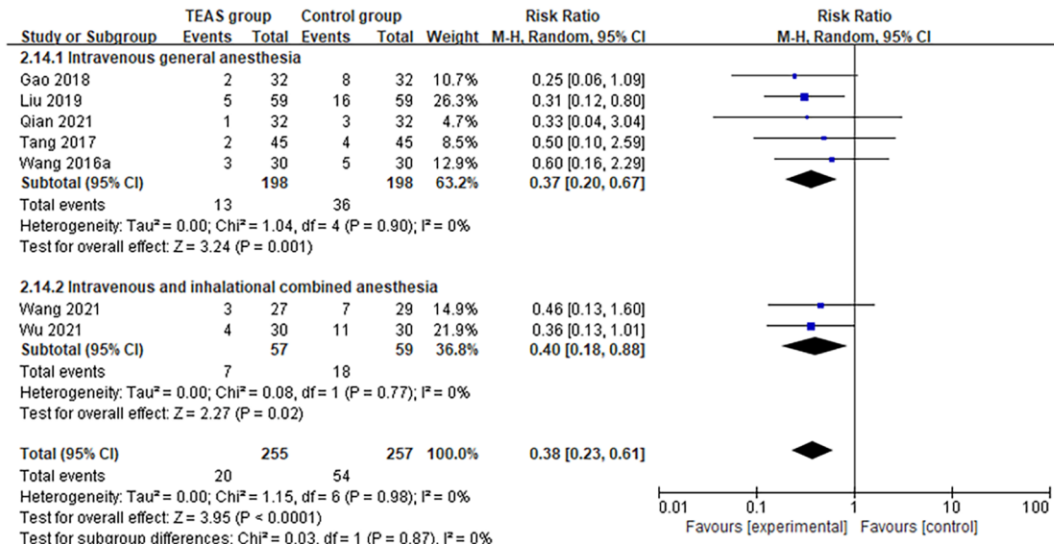

Supplement: medi-101-e32329-s004.pdf [file medi-101-e32329-s004.pdf]

**FIGURE 4** | The funnel plot of PND.

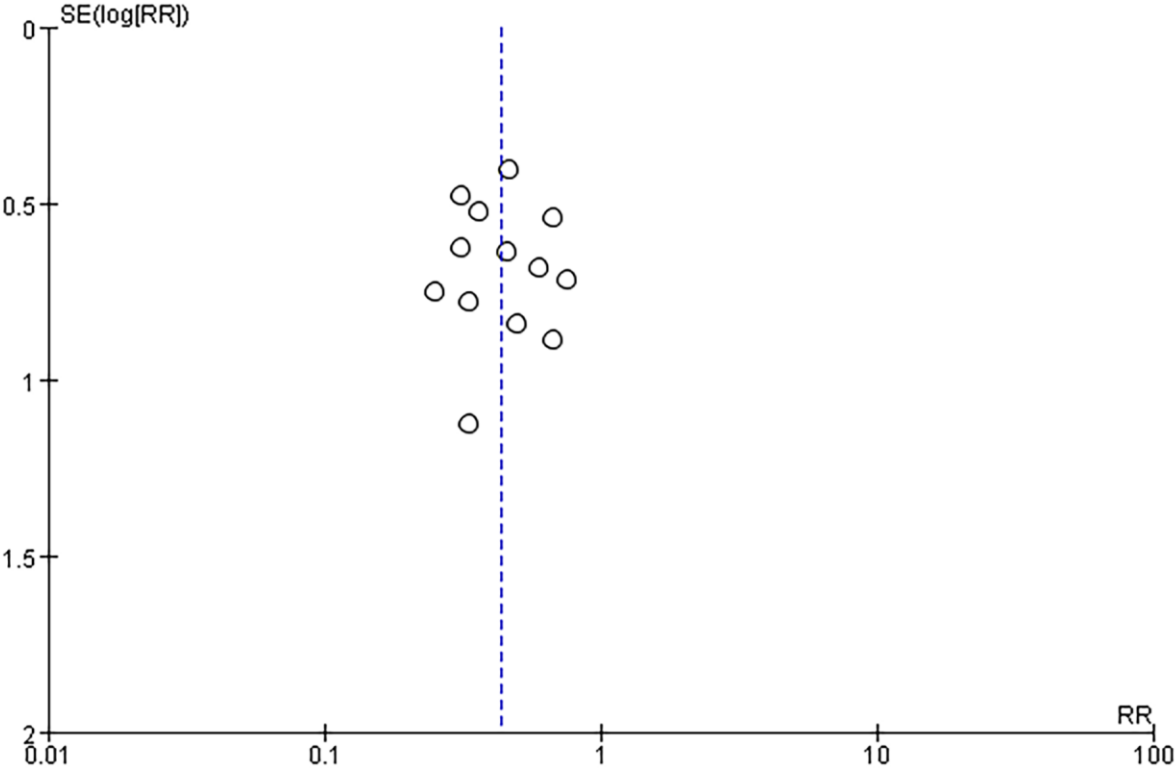

Supplement: medi-101-e32329-s005.pdf [file medi-101-e32329-s005.pdf]
